# Supplementary material for: Pediatric long COVID is characterized by myeloid CCR6 suppression and immune dysregulation
Source: JCI journal article supplement (doi:10.1172/jci.insight.201111), 2026-02-19
Supplement: sd1 [file 1]

**Pediatric Long COVID Is Characterized by Myeloid CCR6 Suppression and Immune Dysregulation – Supplemental information**

**Supplemental Table 1: 37-color panel used for spectral cytometry.**

| <b>Marker</b>    | <b>Fluorochrome</b> | <b>Clone</b> |
|------------------|---------------------|--------------|
| CD19             | Spark NIR 685       | HIB19        |
| HLADR            | BV510               | L243         |
| IgD              | BV480               | IA6-2        |
| IgM              | BV570               | MHM-88       |
| IgA              | FITC                | REA1014      |
| CD27             | APC                 | M-T271       |
| CD21             | V405                | B-ly4        |
| CD38             | APC/Fire 810        | HIT2         |
| CD24             | BUV615              | ML5          |
| CD11c            | BUV805              | B-ly6        |
| CCR7             | BV421               | G043H7       |
| CCR6             | BV711               | G034E3       |
| CXCR5            | BV750               | RF8B2        |
| CXCR3            | PE/Cy7              | G025H6       |
| CD1c             | Alexa Fluor 647     | L161         |
| PD-1             | BV785               | EH12.2H7     |
| CD95             | PE/Cy5              | DX2          |
| CD25             | PE-Alexa Fluor 700  | 3G10         |
| CD127            | APC-R700            | HIL-7R-M21   |
| CD3              | PerCP               | OKT3 (SKT7)  |
| TCR V $\alpha$ 2 | PerCP-Vio           | REA771       |
| CD14             | Spark Blue 550      | 63D3         |
| CD4              | cFluor 568          | SK3          |
| CD8              | Pacific Orange      | 3B5          |
| CD45RA           | BUV395              | 5H9          |
| CD28             | BV650               | CD28.2       |
| CD57             | BV605               | C10-1        |
| CCR5             | BUV563              | 2D7          |
| CD56             | BUV737              | NCAM16.2     |
| CD16             | BUV496              | 3G8          |
| NKG2C            | BUV661              | 134591       |
| NKG2A            | PE-Vio615           | REA110       |
| NKp46            | APC/Fire 750        | 9E2          |
| CD123            | Super Bright 436    | 6H6          |
| CD11b            | BB515               | ICRF44       |
| CD169            | BB700               | 7-239        |
| CD137L           | PE                  | 5F4          |

**Supplemental Table 2: Cell count, marker annotation and myeloid cell population for 17 clusters**

| Cluster | Cell count | Marker |      |       |       |      |       |       |      | Myeloid cell population 1 | Myeloid cell population 2 |
|---------|------------|--------|------|-------|-------|------|-------|-------|------|---------------------------|---------------------------|
|         |            | CD14   | CD16 | CD11c | CD123 | CD1c | CD11b | HLADR | CD95 |                           |                           |
| 1       | 342,575    | +      | +    | +     | -     | -    | +     | +     | +    | Monocytes                 | Intermediate monocytes    |
| 2       | 7,583,745  | +      | -    | +     | -     | -    | +     | +     | +    | Monocytes                 | Classical monocytes       |
| 3       | 192,759    | -      | +    | +     | -     | -    | -     | +     | +    | Monocytes                 | Non-classical monocytes   |
| 4       | 8,905      | -      | +    | -     | -     | -    | low   | low   | +    | Monocytes                 | Non-classical monocytes   |
| 5       | 33,642     | -      | +    | -     | -     | -    | low   | -     | +    | Monocytes                 | Non-classical monocytes   |
| 6       | 452,565    | -      | -    | +     | -     | +    | -     | +     | +    | Dendritic cells           | cDCs                      |
| 7       | 68,514     | +      | -    | +     | -     | +    | -/low | +     | +    | Dendritic cells           | cDCs                      |
| 8       | 273,434    | +      | -    | +     | -     | -    | low   | +     | +    | Monocytes                 | Classical monocytes       |
| 9       | 69,908     | -      | -    | -     | -     | -    | -     | low   | +    | Dendritic cells           | CD123- CD11c- DCs         |
| 10      | 74,789     | +      | -    | low   | -     | -    | low   | low   | +    | Monocytes                 | Classical monocytes       |
| 11      | 11,384     | +      | -    | +     | +     | -    | +     | +     | +    | Monocytes                 | Classical monocytes       |
| 12      | 1,441,128  | +      | -    | +     | -     | -    | +     | low   | +    | Monocytes                 | Classical monocytes       |
| 13      | 649,848    | +      | -    | +     | -     | -    | +     | -     | +    | Monocytes                 | Classical monocytes       |
| 14      | 653,258    | -      | -    | -     | +     | -    | -     | +     | -    | Dendritic cells           | pDCs                      |
| 15      | 72,292     | -      | -    | +     | -     | -    | -     | +     | -    | Dendritic cells           | cDCs                      |
| 16      | 354,045    | -      | -    | -     | -     | -    | -     | +     | -    | Dendritic cells           | CD123- CD11c- DCs         |
| 17      | 40,095     | +      | -    | -     | -     | -    | +     | +     | -/+  | Monocytes                 | Classical monocytes       |

**Supplemental Table 3: Cell count, marker annotation and NK-cell population for 33 clusters**

| Cluster | Cell count | Marker |      |      |       |       |       |      |       | NK-cell population    |
|---------|------------|--------|------|------|-------|-------|-------|------|-------|-----------------------|
|         |            | CD56   | CD16 | CD57 | NKG2C | NKG2A | NKp46 | CCR5 | CXCR3 |                       |
| 1       | 2,306,493  | dim    | +    | -    | -     | +     | -     | -    | -     | CD56dim               |
| 2       | 46,356     | -      | +    | -    | -     | -     | -     | -    | +     | CD56-                 |
| 3       | 56,548     | dim    | +    | -    | -     | -     | -     | -    | +     | CD56dim               |
| 4       | 393,957    | -      | +    | -    | -     | -     | -     | -    | -     | CD56-                 |
| 5       | 3,284,317  | dim    | +    | -    | -     | -     | -     | -    | -     | CD56dim               |
| 6       | 18,331     | dim    | +    | -    | -     | -     | -     | +    | +     | CD56dim               |
| 7       | 350,004    | dim    | +    | -    | -     | +     | -     | -    | +     | CD56dim               |
| 8       | 33,772     | dim    | -    | -    | -     | +     | -     | -    | +     | CD56dim               |
| 9       | 99,504     | dim    | -    | -    | -     | +     | +     | -    | +     | CD56dim               |
| 10      | 187,417    | dim    | +    | -    | -     | +     | +     | -    | +     | CD56dim               |
| 11      | 25,002     | -      | +    | -    | -     | -     | +     | -    | low   | CD56-                 |
| 12      | 150,315    | dim    | +    | -    | -     | -     | +     | -    | +     | CD56dim               |
| 13      | 379,804    | dim    | +    | +    | -     | -     | -     | -    | -     | CD56dim               |
| 14      | 85,325     | dim    | +    | -    | -     | +     | +     | +    | +     | CD56dim               |
| 15      | 211,698    | bright | +    | -    | -     | +     | +     | -    | +     | CD56bright            |
| 16      | 45,591     | bright | -    | -    | -     | -     | +     | -    | +     | CD56bright            |
| 17      | 492,009    | bright | -    | -    | -     | +     | +     | -    | +     | CD56bright            |
| 18      | 42,988     | bright | +    | -    | +     | -     | +     | -    | +     | CD56bright and NKG2C+ |
| 19      | 181,583    | dim    | +    | +    | -     | +     | -     | -    | -     | CD56dim               |
| 20      | 273,266    | dim    | +    | +    | +     | -     | -     | -    | -     | CD56dim and NKG2C+    |
| 21      | 23,394     | dim    | -    | -    | -     | +     | -     | +    | +     | CD56dim               |
| 22      | 17,574     | dim    | -    | -    | -     | +     | +     | +    | +     | CD56dim               |
| 23      | 222,765    | dim    | -    | -    | -     | -     | -     | -    | -     | CD56dim               |
| 24      | 17,905     | bright | -    | -    | +     | -     | +     | -    | +     | CD56bright and NKG2C+ |

|    |         |        |   |   |   |   |   |     |     |                       |
|----|---------|--------|---|---|---|---|---|-----|-----|-----------------------|
| 25 | 84,213  | bright | - | - | + | + | + | -   | +   | CD56bright and NKG2C+ |
| 26 | 46,549  | bright | - | - | - | + | - | -   | low | CD56bright            |
| 27 | 73,682  | bright | - | - | - | + | + | -   | low | CD56bright            |
| 28 | 327,552 | dim    | + | - | + | - | - | -   | -   | CD56dim and NKG2C+    |
| 29 | 26,106  | dim    | - | - | + | - | - | -   | +   | CD56dim and NKG2C+    |
| 30 | 6,280   | -      | + | - | - | - | - | low | +   | CD56-                 |
| 31 | 44,625  | dim    | - | - | - | - | - | -   | +   | CD56dim               |
| 32 | 42,584  | dim    | - | - | - | - | - | +   | low | CD56dim               |
| 33 | 66,657  | dim    | + | - | + | - | - | -   | -   | CD56dim and NKG2C+    |

---

**Supplemental Table 4: Cell count, marker annotation and T-cell population for 37 clusters**

| Cluster | Cell count | Marker |     |     |        |      |      |      |      |       |       |      |       | T cell population 1 | T cell population 2                |
|---------|------------|--------|-----|-----|--------|------|------|------|------|-------|-------|------|-------|---------------------|------------------------------------|
|         |            | TCRVd2 | CD4 | CD8 | CD45RA | CCR7 | CD95 | CD27 | CD28 | CCR6  | CXCR3 | CD25 | CD127 |                     |                                    |
| 1       | 2,504,123  | -      | -   | -   | -/+    | -/+  | -/+  | -/+  | -/+  | -/+   | -/+   | -    | -/+   | DN T cells          | -                                  |
| 2       | 16,264,042 | -      | +   | -   | +      | +    | -    | +    | +    | -     | -     | -    | +     | CD4 T cells         | Tn CD4                             |
| 3       | 1,109,850  | -      | +   | -   | +      | +    | -    | +    | +    | -     | -     | +    | -     | CD4 T cells         | Treg                               |
| 4       | 7,785,873  | -      | -   | +   | +      | +    | -    | +    | +    | -     | -/+   | -    | +     | CD8 T cells         | Tn CD8                             |
| 5       | 1,427,263  | -      | -   | +   | -      | -    | +    | +    | +    | -/+   | -     | +    | -/+   | CD8 T cells         | Ttm CD8                            |
| 6       | 667,707    | -      | -   | +   | +      | +    | +    | +    | +    | -     | +     | -    | +     | CD8 T cells         | Tscm CD4                           |
| 7       | 496,750    | -      | -   | +   | +      | -    | +    | +    | -    | -     | +     | -/+  | +     | CD8 T cells         | Temra CD8                          |
| 8       | 111,744    | -      | +   | -   | +      | +    | +    | +    | +    | -/+   | +     | -/+  | -/+   | CD4 T cells         | Tscm CD4                           |
| 9       | 245,538    | -      | +   | -   | +      | +    | -    | +    | +    | -     | +     | -    | +     | CD4 T cells         | Tn CD4                             |
| 10      | 53.276     | -      | +   | -   | +      | -    | +    | +    | +    | -/+   | +     | -/+  | +     | CD4 T cells         | Temra CD4                          |
| 11      | 21.127     | -      | +   | -   | +      | +    | +    | +    | +    | -     | -     | -    | -     | CD4 T cells         | Tscm CD4                           |
| 12      | 1.931.523  | -      | -   | +   | -      | -    | +    | +    | +    | +     | -/+   | -    | +     | CD8 T cells         | Ttm CD8                            |
| 13      | 1.554.760  | -      | +   | -   | -      | +    | +    | +    | +    | -     | -     | -/+  | +     | CD4 T cells         | Tcm CD4                            |
| 14      | 238.059    | -      | +   | -   | -      | -    | +    | +    | +    | -     | -     | -/+  | +     | CD4 T cells         | Ttm CD4                            |
| 15      | 685.024    | -      | -   | +   | +      | -    | -/+  | +    | -    | -     | -/+   | -    | -     | CD8 T cells         | Temra CD8                          |
| 16      | 307,529    | -      | -   | +   | -      | +    | +    | +    | +    | low/+ | +     | +    | +     | CD8 T cells         | Tcm CD8                            |
| 17      | 1,611,587  | -      | -   | +   | +      | -    | +    | -    | -    | -     | -/+   | -    | -     | CD8 T cells         | Temra CD8                          |
| 18      | 490,180    | -      | -   | +   | -      | -    | +    | +    | -    | -     | -/+   | -    | -     | CD8 T cells         | Tem CD8                            |
| 19      | 632,504    | -      | -   | +   | -      | -    | +    | -    | -    | -     | -/+   | -    | -     | CD8 T cells         | CD8+, CD45RA-, CCR7-, CD27-, CD28- |
| 20      | 2,278,361  | -      | +   | -   | -      | +    | +    | +    | +    | -     | +     | -/+  | +     | CD4 T cells         | Tcm CD4                            |
| 21      | 949,601    | -      | +   | -   | -      | -    | +    | +    | +    | -     | +     | -/+  | +     | CD4 T cells         | Ttm CD4                            |
| 22      | 10,791     | -      | +   | +   | -      | -/+  | +    | +    | +    | -     | -     | -/+  | +     | DP T cells          | -                                  |
| 23      | 70,577     | -      | -   | +   | -      | +    | +    | +    | +    | -     | -     | -/+  | +     | CD8 T cells         | Tcm CD8                            |

|    |           |   |   |   |     |     |   |   |     |       |     |     |   |                        |                                    |
|----|-----------|---|---|---|-----|-----|---|---|-----|-------|-----|-----|---|------------------------|------------------------------------|
| 24 | 25,965    | - | - | + | -   | -   | + | + | +   | -     | -   | -/+ | + | CD8 T cells            | Ttm CD8                            |
| 25 | 84,7667   | - | + | - | -   | -/+ | + | + | +   | -/+   | -/+ | +   | - | CD4 T cells            | Treg                               |
| 26 | 307,928   | - | + | - | -   | -   | + | - | -   | -     | -/+ | -   | - | CD4 T cells            | CD4+, CD45RA-, CCR7-, CD27-, CD28- |
| 27 | 177,860   | - | - | + | -   | -   | + | - | +   | +     | -/+ | -   | + | CD8 T cells            | CD8+, CD45RA-, CCR7-, CD27-, CD28+ |
| 28 | 1,265,483 | - | + | - | -   | -   | + | - | +   | -     | -/+ | -/+ | + | CD4 T cells            | Tem CD4                            |
| 29 | 1,155,959 | - | + | - | -   | +   | + | + | +   | +     | +   | +   | + | CD4 T cells            | Tcm CD4                            |
| 30 | 522,811   | - | + | - | -   | -   | + | + | +   | +     | +   | +   | + | CD4 T cells            | Ttm CD4                            |
| 31 | 1,176,983 | - | + | - | -   | +   | + | + | +   | +     | -   | +   | + | CD4 T cells            | Tcm CD4                            |
| 32 | 169,533   | - | + | - | -   | -   | + | + | +   | +     | -   | +   | + | CD4 T cells            | Ttm CD4                            |
| 33 | 406,018   | - | + | - | -   | -   | + | - | +   | +     | +   | +   | + | CD4 T cells            | Tem CD4                            |
| 34 | 362,257   | - | + | - | -   | -   | + | - | +   | +     | -   | +   | + | CD4 T cells            | Tem CD4                            |
| 35 | 333,288   | + | - | + | -/+ | -   | - | + | -/+ | -     | +   | low | + | $\gamma\delta$ T cells | -                                  |
| 36 | 3,042,351 | + | - | - | -/+ | -   | - | + | -/+ | -     | +   | -   | + | $\gamma\delta$ T cells | -                                  |
| 37 | 1,196,647 | + | - | - | -   | -   | + | + | +   | low/+ | +   | low | + | $\gamma\delta$ T cells | -                                  |

---

**Supplemental Table 5: Cell count, marker annotation and B-cell population for 31 clusters**

| Cluster | Cell count | Marker |     |     |      |      |      |      |       |      |      |       |       | B cell population       |
|---------|------------|--------|-----|-----|------|------|------|------|-------|------|------|-------|-------|-------------------------|
|         |            | IgD    | IgM | IgA | CD27 | CD21 | CD38 | CD24 | CD11c | CCR7 | CCR6 | CXCR5 | CXCR3 |                         |
| 1       | 113,849    | -      | -   | +   | +    | +    | low  | +    | -     | +    | +    | +     | -     | Switched memory B cells |
| 2       | 41,077     | -      | -   | +   | +    | +    | low  | low  | -/+   | -    | +    | +     | -     | Switched memory B cells |
| 3       | 30,013     | -      | -/+ | -   | +    | -    | high | -    | -     | -    | -    | -     | -     | Plasmablasts            |
| 4       | 27,104     | -      | -   | +   | +    | -    | high | -    | -     | -    | -    | -     | -     | Plasmablasts            |
| 5       | 29,758     | -      | -   | -   | -    | -    | -    | -    | +     | -    | +    | -     | +     | Switched memory B cells |
| 6       | 22,410     | -      | -   | -/+ | low  | -    | high | -    | -     | -    | -    | -     | -     | Plasmablasts            |
| 7       | 3,089,971  | +      | +   | -   | -    | +    | low  | low  | -     | +    | +    | +     | -     | Naïve B cells           |
| 8       | 19,772     | +      | -   | -   | -    | -    | -    | -    | -/+   | -    | +    | -     | +     | IgD-only B cells        |
| 9       | 50,271     | +      | +   | -   | -    | -    | +    | +    | -     | -    | low  | +     | -     | Transitional B cells    |
| 10      | 175,072    | +      | +   | -   | -    | +    | high | high | -     | -    | low  | -/+   | -     | Transitional B cells    |
| 11      | 38,086     | -      | -   | +   | +    | +    | low  | +    | -     | +    | +    | +     | +     | Switched memory B cells |
| 12      | 69,857     | -      | -   | -   | +    | +    | -    | low  | -     | -    | +    | +     | -     | Switched memory B cells |
| 13      | 138,813    | -      | -   | -   | +    | +    | low  | +    | -     | +    | +    | +     | +     | Switched memory B cells |
| 14      | 52,186     | +      | -   | -   | -    | +    | -    | -    | -     | -    | -    | +     | -     | IgD-only B cells        |
| 15      | 21,621     | -      | -   | -   | -    | -    | -    | -    | -     | -    | -    | low   | -     | Switched memory B cells |
| 16      | 28,476     | -      | -   | -   | +    | -/+  | low  | low  | -/+   | -    | +    | +     | +     | Switched memory B cells |
| 17      | 55,557     | -      | -   | -   | +    | +    | -    | high | -     | -    | +    | +     | -     | Switched memory B cells |
| 18      | 206,392    | -      | -   | -   | low  | +    | low  | +    | -     | +    | +    | +     | -     | Switched memory B cells |
| 19      | 13,268     | -      | -/+ | -   | +    | +    | +    | -    | low   | -    | +    | low   | -     | Switched memory B cells |
| 20      | 586,535    | +      | +   | -   | -    | +    | +    | +    | -     | +    | +    | +     | -     | Transitional B cells    |
| 21      | 18,601     | -      | +   | -   | +    | +    | -    | high | -     | -    | +    | +     | +     | IgM-only B cells        |
| 22      | 20,245     | -      | +   | -   | +    | +    | low  | high | -     | +    | +    | +     | -     | IgM-only B cells        |
| 23      | 81,751     | +      | +   | -   | +    | +    | -    | high | -     | -    | +    | +     | -     | MZ-like B cells         |
| 24      | 338,391    | +      | +   | -   | low  | +    | -    | +    | -     | +    | +    | +     | -     | Naïve B cells           |

|    |        |   |   |   |     |     |     |      |     |   |   |     |     |                      |
|----|--------|---|---|---|-----|-----|-----|------|-----|---|---|-----|-----|----------------------|
| 25 | 25,560 | + | + | - | +   | +   | -   | high | low | - | + | +   | +   | MZ-like B cells      |
| 26 | 37,847 | + | + | - | low | +   | -   | +    | -   | + | + | +   | +   | Naïve B cells        |
| 27 | 96,888 | + | + | - | -   | +   | low | low  | -   | + | + | +   | +   | Naïve B cells        |
| 28 | 5,427  | + | - | - | +   | +   | -   | -/+  | -/+ | - | + | +   | -/+ | IgD-only B cells     |
| 29 | 14,453 | + | + | - | -   | low | -   | -    | -/+ | - | + | low | +   | Naïve B cells        |
| 30 | 20,324 | + | + | - | -   | +   | -   | +    | -   | - | + | +   | +   | Naïve B cells        |
| 31 | 14,056 | + | + | - | -   | +   | +   | +    | -   | - | + | +   | +   | Transitional B cells |

---

**Supplemental Table 6: Frequency and annotation of different immune cell populations in CYP with and without LC.**

| Cell type                                                                       | Annotation                                                                                          | LC cohort                      | Control cohort                 | LC cohort                 | Control cohort            |
|---------------------------------------------------------------------------------|-----------------------------------------------------------------------------------------------------|--------------------------------|--------------------------------|---------------------------|---------------------------|
|                                                                                 |                                                                                                     | % of total PBMCs (median, IQR) | % of total PBMCs (median, IQR) | % of parent (median, IQR) | % of parent (median, IQR) |
| Monocytes                                                                       | (SSC <sup>-</sup> A/FSC <sup>-</sup> A) CD14 <sup>+/-</sup> , CD16 <sup>-/+</sup>                   | 10.15 (7.61, 12.6)             | 11.51 (10.00, 16.74)           | -                         | -                         |
| Classical monocytes                                                             | CD14 <sup>+</sup> , CD16 <sup>-</sup>                                                               | -                              | -                              | 94.71 (93.30, 96.23)      | 95.05 (93.46, 96.70)      |
| Intermediate monocytes                                                          | CD14 <sup>+</sup> , CD16 <sup>+</sup>                                                               | -                              | -                              | 2.91 (1.95, 3.98)         | 3.02 (1.96, 4.45)         |
| Non-classical monocytes                                                         | CD14 <sup>-</sup> , CD16 <sup>+</sup>                                                               | -                              | -                              | 2.18 (1.40, 2.85)         | 1.50 (0.65, 2.26)         |
| Dendritic Cells                                                                 | CD3 <sup>-</sup> , CD19 <sup>-</sup> , HLADR <sup>+</sup> , CD14 <sup>-/+</sup> , CD16 <sup>-</sup> |                                | 1.65 (1.45, 1.81)              | -                         | -                         |
| cDCs                                                                            | CD14 <sup>-/+</sup> , CD16 <sup>-</sup> , CD11c <sup>+</sup> , CD123 <sup>-</sup>                   | -                              | -                              | 38.62 (32.32, 46.16)      | 34.46 (25.68, 42.62)      |
| pDCs                                                                            | CD14 <sup>-</sup> , CD16 <sup>-</sup> , CD11c <sup>-</sup> , CD123 <sup>+</sup>                     | -                              | -                              | 34.17 (27.26, 42.80)      | 40.42 (35.87, 47.16)      |
| CD11c <sup>-</sup> , CD123 <sup>-</sup> DCs                                     | CD14 <sup>-</sup> , CD16 <sup>-</sup> , CD11c <sup>-</sup> , CD123 <sup>-</sup>                     | -                              | -                              | 19.84 (15.11, 24.86)      | 16.43 (13.41, 22.26)      |
| NK cells                                                                        | CD3 <sup>-</sup> , CD19 <sup>-</sup> , HLADR <sup>-</sup> , CD14 <sup>-</sup>                       | 9.29 (7.16, 13.19)             | 9.76 (5.81, 12.68)             | -                         | -                         |
| Early NK cells                                                                  | CD56 <sup>bright</sup>                                                                              | -                              | -                              | 10.23 (6.97, 14.92)       | 12.52 (8.46, 15.00)       |
| Mature NK cells                                                                 | CD56 <sup>dim</sup>                                                                                 | -                              | -                              | 84.52 (78.21, 88.24)      | 82.85 (78.95, 84.69)      |
| Exhausted NK cells                                                              | CD56 <sup>-</sup>                                                                                   | -                              | -                              | 4.09 (2.67, 5.85)         | 3.95 (2.33, 5.73)         |
| NKG2C <sup>+</sup> memory NK cells                                              | NKG2C <sup>+</sup>                                                                                  | -                              | -                              | 3.35 (1.41, 10.95)        | 1.98 (1.07, 5.68)         |
| CD4 T cells                                                                     | CD14 <sup>-</sup> , CD3 <sup>+</sup> , TCRVd2 <sup>-</sup> , CD4 <sup>+</sup> , CD8 <sup>-</sup>    | 31.57 (26.73, 35.67)           | 25.74 (21.08, 34.33)           | -                         | -                         |
| CD4 Tn                                                                          | CD45RA <sup>+</sup> , CCR7 <sup>+</sup> , CD95 <sup>-</sup>                                         | -                              | -                              | 57.07 (48.38, 64.21)      | 53.24 (42.01, 57.95)      |
| CD4 Tscm                                                                        | CD45RA <sup>+</sup> , CCR7 <sup>+</sup> , CD95 <sup>+</sup>                                         | -                              | -                              | 0.30 (0.22,0.43)          | 0.31 (0.24,0.42)          |
| CD4 Tcm                                                                         | CD45RA <sup>-</sup> , CCR7 <sup>+</sup>                                                             | -                              | -                              | 20.80 (15.61, 25.48)      | 23.90 (15.61, 25.48)      |
| CD4 Ttm                                                                         | CD45RA <sup>-</sup> , CCR7 <sup>-</sup> , CD27 <sup>+</sup> , CD28 <sup>+</sup>                     | -                              | -                              | 5.69 (4.05, 7.94)         | 6.06 (4.43, 9.77)         |
| CD4 Tem                                                                         | CD45RA <sup>-</sup> , CCR7 <sup>-</sup> , CD27 <sup>-</sup> , CD28 <sup>+</sup>                     | -                              | -                              | 6.42 (4.05, 7.94)         | 6.06 (4.43, 9.77)         |
| CD45RA <sup>-</sup> , CCR7 <sup>-</sup> , CD27 <sup>-</sup> , CD28 <sup>-</sup> | CD45RA <sup>-</sup> , CCR7 <sup>-</sup> , CD27 <sup>-</sup> , CD28 <sup>-</sup>                     | -                              | -                              | 0.11 (0.03, 0.94)         | 0.11 (0.06, 1.17)         |
| CD4 Temra                                                                       | CD45RA <sup>+</sup> , CCR7 <sup>-</sup>                                                             | -                              | -                              | 0.06 (0.04, 0.11)         | 0.07 (0.04, 0.10)         |
| CD4 Treg                                                                        | CD25 <sup>+</sup> , CD127 <sup>-</sup>                                                              | -                              | -                              | 6.77 (5.55, 8.04)         | 6.30 (5.22, 7.26)         |

|                                                                                 |                                                                                                       |                      |                      |                      |                      |
|---------------------------------------------------------------------------------|-------------------------------------------------------------------------------------------------------|----------------------|----------------------|----------------------|----------------------|
| CD8 T cells                                                                     | CD14 <sup>-</sup> , CD3 <sup>+</sup> , TCRVd2 <sup>-</sup> , CD4 <sup>-</sup> , CD8 <sup>+</sup>      | 17.35 (14.80, 19.36) | 19.01 (16.43, 21.81) | -                    | -                    |
| CD8 Tn                                                                          | CD45RA <sup>+</sup> , CCR7 <sup>+</sup> , CD95 <sup>-</sup>                                           | -                    | -                    | 48.35 (38.29, 60.20) | 42.96 (31.70, 54.98) |
| CD8 Tscm                                                                        | CD45RA <sup>+</sup> , CCR7 <sup>+</sup> , CD95 <sup>+</sup>                                           | -                    | -                    | 3.63 (2.56, 4.77)    | 4.75 (3.36, 5.62)    |
| CD8 Tcm                                                                         | CD45RA <sup>-</sup> , CCR7 <sup>+</sup>                                                               | -                    | -                    | 2.03 (1.12, 3.46)    | 1.22 (0.65, 1.59)    |
| CD45RA <sup>-</sup> , CCR7 <sup>-</sup> , CD27 <sup>-</sup> , CD28 <sup>+</sup> | CD45RA <sup>-</sup> , CCR7 <sup>-</sup> , CD27 <sup>-</sup> , CD28 <sup>+</sup>                       | -                    | -                    | 0.69 (0.44, 1.44)    | 0.61 (0.46, 1.88)    |
| CD8 Ttm                                                                         | CD45RA <sup>-</sup> , CCR7 <sup>-</sup> , CD27 <sup>+</sup> , CD28 <sup>+</sup>                       | -                    | -                    | 20.31 (15.06, 25.88) | 19.01 (14.08, 26.81) |
| CD8 Tem                                                                         | CD45RA <sup>-</sup> , CCR7 <sup>-</sup> , CD27 <sup>+</sup> , CD28 <sup>-</sup>                       | -                    | -                    | 2.59 (1.68, 4.16)    | 2.80 (1.69, 4.03)    |
| CD45RA <sup>-</sup> , CCR7 <sup>-</sup> , CD27 <sup>-</sup> , CD28 <sup>-</sup> | CD45RA <sup>-</sup> , CCR7 <sup>-</sup> , CD27 <sup>-</sup> , CD28 <sup>-</sup>                       | -                    | -                    | 2.58 (1.28, 5.44)    | 3.09 (0.90, 8.47)    |
| CD8 Temra                                                                       | CD45RA <sup>+</sup> , CCR7 <sup>-</sup>                                                               | -                    | -                    | 13.51 (6.22, 21.14)  | 14.51 (11.06, 28.55) |
| γδ T cells                                                                      | CD14 <sup>-</sup> , CD3 <sup>+</sup> , TCRVd2 <sup>+</sup>                                            | 3.78 (2.38, 5.87)    | 4.00 (2.28, 6.91)    | -                    | -                    |
| DN T cells                                                                      | CD14 <sup>-</sup> , CD3 <sup>+</sup> , TCRVd2 <sup>-</sup> , CD4 <sup>-</sup> , CD8 <sup>-</sup>      | 2.46 (1.98, 3.15)    | 2.78 (2.41, 3.84)    | -                    | -                    |
| DP T cells                                                                      | CD14 <sup>-</sup> , CD3 <sup>+</sup> , TCRVd2 <sup>-</sup> , CD4 <sup>+</sup> , CD8 <sup>+</sup>      | 0.007 (0.004, 0.014) | 0.006 (0.004, 0.007) | -                    | -                    |
| B cells                                                                         | CD3 <sup>-</sup> , CD19 <sup>+</sup> , CD14 <sup>-</sup>                                              | 5.91 (4.73, 7.52)    | 8.13 (4.67, 9.52)    | -                    | -                    |
| Transitional B cell                                                             | IgD <sup>+</sup> , IgM <sup>+</sup> , CD27 <sup>-</sup> , CD38 <sup>+/hi</sup> , CD24 <sup>+/hi</sup> | -                    | -                    | 12.85 (9.42, 18.04)  | 16.46 (12.09, 21.62) |
| Naïve B cell                                                                    | IgD <sup>+</sup> , IgM <sup>+</sup> , CD27 <sup>-</sup> , CD38 <sup>-/lo</sup>                        | -                    | -                    | 65.77 (58.83, 70.72) | 69.97 (61.01, 73,85) |
| MZ-like B cell                                                                  | IgD <sup>+</sup> , IgM <sup>+</sup> , CD27 <sup>+</sup> , CD21 <sup>+</sup>                           | -                    | -                    | 1.32 (0.76, 1.98)    | 0.63 (0.48, 1.49)    |
| IgM-only B cell                                                                 | IgM <sup>+</sup> , IgD <sup>-</sup> , CD27 <sup>+</sup>                                               | -                    | -                    | 0.64 (0.41, 1.04)    | 0.55 (0.39, 0.66)    |
| IgD-only B cell                                                                 | IgD <sup>+</sup> , IgM <sup>-</sup>                                                                   | -                    | -                    | 1.56 (1.15, 2.65)    | 1.59 (0.91, 2.31)    |
| Switched memory B cells                                                         | IgD <sup>-</sup> , IgM <sup>-</sup> , CD38 <sup>-/+</sup>                                             | -                    | -                    | 13.19 (9.90, 18.32)  | 10.77 (9.15, 12.94)  |
| Plasmablasts                                                                    | IgD <sup>-</sup> , IgM <sup>-</sup> , CD38 <sup>hi</sup>                                              | -                    | -                    | 1.05 (0.66, 1.80)    | 0.91 (0.70, 1.80)    |

**Supplemental Table 7: Coefficients and p-values of linear regression models**

|                       | Coefficients |          |                         |            | LRT p values |       |          |          |
|-----------------------|--------------|----------|-------------------------|------------|--------------|-------|----------|----------|
|                       | Age          | Sex=Male | Exposure= Two exposures | Group=PASC | Age          | Sex   | Exposure | Group    |
| <b>S2 IgG</b>         | 0.024        | -0.091   | 0.711                   | 0.061      | 0.235        | 0.418 | 6.12E-07 | 0.669    |
| <b>RBD IgG</b>        | 0.014        | 0.269    | 1.109                   | -0.743     | 0.562        | 0.066 | 4.41E-10 | 8.99E-05 |
| <b>S2 IgA</b>         | 0.039        | -0.001   | 0.318                   | -0.061     | 0.038        | 0.925 | 0.011    | 0.652    |
| <b>RBD IgA</b>        | 0.013        | 0.013    | 0.728                   | -0.310     | 0.549        | 0.915 | 2.01E-06 | 0.046    |
| <b>Neutralization</b> | 0.039        | 0.204    | 0.568                   | -0.330     | 0.192        | 0.112 | 1.47E-04 | 0.048    |

**Supplemental Table 8: SARS-CoV-2 antigen and RNA persistence in CYP with and without long COVID**

| ID | Cohort     | Spike (fg/mL) | Nucelocapsid (fg/mL) | 3'UTR SARS-CoV-2 (copies/mL) | N SARS-CoV-2 (copies/mL) | Ng SARS-CoV-2 (copies/mL) | Nsg SARS-CoV-2 (copies/mL) |
|----|------------|---------------|----------------------|------------------------------|--------------------------|---------------------------|----------------------------|
| 1  | Long COVID | -             | -                    | -                            | -                        | -                         | -                          |
| 2  | Long COVID | -             | 842                  | -                            | -                        | -                         | -                          |
| 3  | Long COVID | -             | -                    | -                            | -                        | -                         | -                          |
| 4  | Long COVID | -             | -                    | -                            | -                        | -                         | -                          |
| 6  | Long COVID | -             | -                    | -                            | -                        | -                         | -                          |
| 7  | Long COVID | -             | -                    | -                            | -                        | -                         | -                          |
| 8  | Long COVID | -             | -                    | -                            | -                        | -                         | -                          |
| 9  | Long COVID | -             | -                    | -                            | -                        | -                         | -                          |
| 10 | Long COVID | -             | -                    | -                            | -                        | -                         | -                          |
| 12 | Long COVID | -             | -                    | -                            | -                        | -                         | -                          |
| 14 | Long COVID | -             | -                    | -                            | -                        | -                         | -                          |
| 15 | Long COVID | -             | 11,944               | -                            | -                        | -                         | -                          |
| 17 | Long COVID | -             | -                    | -                            | -                        | -                         | -                          |
| 19 | Long COVID | -             | -                    | -                            | -                        | -                         | -                          |
| 20 | Long COVID | -             | -                    | -                            | -                        | -                         | -                          |
| 21 | Long COVID | -             | -                    | -                            | -                        | -                         | -                          |
| 23 | Long COVID | -             | -                    | -                            | -                        | -                         | -                          |
| 24 | Long COVID | -             | -                    | -                            | -                        | -                         | -                          |
| 25 | Long COVID | -             | -                    | -                            | -                        | -                         | -                          |
| 26 | Long COVID | -             | -                    | -                            | -                        | -                         | -                          |
| 27 | Long COVID | 260           | -                    | -                            | -                        | -                         | -                          |
| 28 | Long COVID | 262           | -                    | -                            | -                        | -                         | -                          |
| 29 | Long COVID | -             | -                    | -                            | -                        | -                         | -                          |
| 30 | Long COVID | -             | -                    | -                            | -                        | -                         | -                          |
| 31 | Long COVID | -             | -                    | -                            | -                        | -                         | -                          |

|    |            |     |     |    |   |   |    |
|----|------------|-----|-----|----|---|---|----|
| 33 | Long COVID | -   | -   | -  | - | - | -  |
| 34 | Long COVID | -   | -   | -  | - | - | -  |
| 35 | Long COVID | -   | -   | -  | - | - | -  |
| 36 | Long COVID | -   | -   | -  | - | - | -  |
| 37 | Long COVID | -   | -   | -  | - | - | -  |
| 38 | Long COVID | 358 | -   | -  | - | - | -  |
| 39 | Long COVID | -   | -   | -  | - | - | -  |
| 40 | Long COVID | 267 | -   | -  | - | - | -  |
| 42 | Long COVID | -   | -   | -  | - | - | -  |
| 43 | Long COVID | -   | -   | -  | - | - | -  |
| 44 | Long COVID | -   | -   | -  | - | - | -  |
| 45 | Long COVID | -   | -   | -  | - | - | -  |
| 46 | Long COVID | -   | -   | -  | - | - | -  |
| 47 | Long COVID | -   | -   | -  | - | - | -  |
| 48 | Long COVID | -   | -   | 14 | - | - | -  |
| 49 | Long COVID | -   | -   | -  | - | - | -  |
| 50 | Long COVID | -   | -   | -  | - | - | -  |
| 51 | Long COVID | -   | -   | -  | - | - | 14 |
| 52 | Long COVID | -   | -   | -  | - | - | -  |
| 53 | Long COVID | -   | -   | -  | - | - | -  |
| 55 | Long COVID | -   | 527 | -  | - | - | -  |
| 56 | Long COVID | -   | -   | -  | - | - | -  |
| 57 | Long COVID | -   | -   | -  | - | - | -  |
| 58 | Long COVID | -   | -   | -  | - | - | -  |
| 59 | Long COVID | -   | -   | -  | - | - | -  |
| 60 | Long COVID | -   | -   | -  | - | - | -  |
| 61 | Long COVID | -   | -   | -  | - | - | -  |
| 62 | Long COVID | -   | 529 | -  | - | - | -  |

|    |            |     |       |   |    |   |   |
|----|------------|-----|-------|---|----|---|---|
| 63 | Long COVID | -   | -     | - | -  | - | - |
| 65 | Long COVID | -   | -     | - | -  | - | - |
| 67 | Long COVID | -   | -     | - | -  | - | - |
| 68 | Long COVID | 250 | 9,324 | - | -  | - | - |
| 69 | Long COVID | -   | -     | - | -  | - | - |
| 70 | Long COVID | -   | -     | - | -  | - | - |
| 71 | Long COVID | -   | -     | - | -  | - | - |
| 73 | Long COVID | -   | -     | - | -  | - | - |
| 74 | Long COVID | -   | 8,555 | - | -  | - | - |
| 76 | Long COVID | -   | -     | - | -  | - | - |
| 77 | Long COVID | -   | -     | - | 13 | - | - |
| 78 | Long COVID | -   | -     | - | -  | - | - |
| 79 | Long COVID | -   | -     | - | -  | - | - |
| 80 | Long COVID | -   | -     | - | -  | - | - |
| 81 | Long COVID | -   | -     | - | -  | - | - |
| 82 | Long COVID | -   | -     | - | -  | - | - |
| 83 | Long COVID | -   | -     | - | -  | - | - |
| 84 | Long COVID | -   | -     | - | -  | - | - |
| 85 | Long COVID | -   | -     | - | -  | - | - |
| 86 | Long COVID | -   | 869   | - | -  | - | - |
| 87 | Long COVID | -   | -     | - | -  | - | - |
| 88 | Long COVID | -   | -     | - | -  | - | - |
| 89 | Long COVID | -   | -     | - | -  | - | - |
| 90 | Long COVID | -   | -     | - | -  | - | - |
| 91 | Long COVID | -   | -     | - | -  | - | - |
| 92 | Long COVID | -   | -     | - | -  | - | - |
| 93 | Long COVID | -   | -     | - | -  | - | - |
| 94 | Long COVID | -   | -     | - | -  | - | - |

|     |            |     |     |   |    |   |    |
|-----|------------|-----|-----|---|----|---|----|
| 96  | Long COVID | -   | 659 | - | -  | - | -  |
| 98  | Long COVID | -   | -   | - | -  | - | -  |
| 99  | Long COVID | -   | -   | - | -  | - | -  |
| 100 | Long COVID | -   | -   | - | -  | - | -  |
| 101 | Long COVID | -   | -   | - | -  | - | -  |
| 102 | Long COVID | -   | -   | - | -  | - | -  |
| 103 | Long COVID | -   | 671 | - | -  | - | -  |
| 104 | Long COVID | -   | -   | - | 16 | - | -  |
| 105 | Long COVID | -   | -   | - | -  | - | -  |
| 106 | Long COVID | -   | -   | - | -  | - | -  |
| 107 | Long COVID | 267 | -   | - | -  | - | 13 |
| 108 | Long COVID | -   | -   | - | -  | - | -  |
| 109 | Long COVID | -   | -   | - | -  | - | -  |
| 110 | Long COVID | -   | -   | - | -  | - | -  |
| 111 | Long COVID | -   | -   | - | -  | - | -  |
| 112 | Long COVID | -   | -   | - | -  | - | -  |
| 114 | Long COVID | -   | -   | - | -  | - | -  |
| 115 | Long COVID | -   | -   | - | -  | - | -  |
| C1  | Controls   | -   | -   | - | -  | - | -  |
| C2  | Controls   | -   | -   | - | -  | - | -  |
| C3  | Controls   | -   | -   | - | -  | - | -  |
| C4  | Controls   | -   | -   | - | -  | - | -  |
| C5  | Controls   | -   | -   | - | -  | - | -  |
| C7  | Controls   | -   | -   | - | -  | - | 25 |
| C8  | Controls   | -   | -   | - | -  | - | -  |
| C9  | Controls   | -   | -   | - | -  | - | -  |
| C10 | Controls   | -   | -   | - | -  | - | -  |
| C11 | Controls   | -   | -   | - | -  | - | -  |

|     |          |   |   |   |   |   |   |    |
|-----|----------|---|---|---|---|---|---|----|
| C13 | Controls | - | - | - | - | - | - | -  |
| C14 | Controls | - | - | - | - | - | - | -  |
| C16 | Controls | - | - | - | - | - | - | -  |
| C17 | Controls | - | - | - | - | - | - | 28 |
| C18 | Controls | - | - | - | - | - | - | -  |
| C19 | Controls | - | - | - | - | - | - | -  |
| C20 | Controls | - | - | - | - | - | - | -  |
| C21 | Controls | - | - | - | - | - | - | -  |

---

**Supplemental Table 9: Spearman correlations of time since last antigen exposure**

| <b>Group</b> | <b>Variable</b>                 | <b>Rho</b> | <b>P.value</b> |
|--------------|---------------------------------|------------|----------------|
| Long COVID   | CCR6.MFI.CD56bright.NK.cells    | 0.267      | 0.008          |
| Long COVID   | CD8.MFI.CD56-.NK.cells          | -0.256     | 0.011          |
| Long COVID   | CXCR5.MFI.cDCs                  | -0.139     | 0.171          |
| Controls     | CCR6.MFI.Intermediate.monocytes | -0.368     | 0.178          |
| Controls     | CXCR5.MFI.Tem.CD4               | -0.396     | 0.182          |
| Controls     | CD8.MFI.CD56..NK.cells          | -0.243     | 0.382          |
| Long COVID   | CCR6.MFI.Classical.monocytes    | -0.082     | 0.420          |
| Long COVID   | CCR6.MFI.Intermediate.monocytes | -0.082     | 0.421          |
| Long COVID   | CCR6.MFI.Monocytes              | -0.076     | 0.458          |
| Long COVID   | CD1c.MFI.IgM.only.B.cells       | -0.076     | 0.467          |
| Long COVID   | CD1c.MFI.MZ.like.B.cells        | -0.070     | 0.503          |
| Long COVID   | CXCR5.MFI.Tem.CD4               | 0.028      | 0.788          |
| Controls     | CXCR5.MFI.cDCs                  | -0.061     | 0.832          |
| Controls     | CD1c.MFI.MZ.like.B.cells        | -0.036     | 0.903          |
| Controls     | CCR6.MFI.CD56bright.NK.cells    | -0.036     | 0.903          |
| Controls     | CD1c.MFI.IgM.only.B.cells       | -0.021     | 0.944          |
| Controls     | CCR6.MFI.Classical.monocytes    | -0.018     | 0.954          |
| Controls     | CCR6.MFI.Monocytes              | -0.018     | 0.954          |

**Supplemental Table 10: Mann-Whitney Test comparing the significant results between infected and uninfected (vaccinated) controls**

| <b>Variable</b>             | <b>p.value</b> | <b>p.adj</b> |
|-----------------------------|----------------|--------------|
| Cluster.19.B.cells          | 0.013          | 0.451        |
| Cluster.15.B.cells          | 0.028          | 0.451        |
| CCR6.CD56bright.NK.cells    | 0.040          | 0.451        |
| CD4.Tcm                     | 0.112          | 0.587        |
| CD8.tcm                     | 0.190          | 0.886        |
| Cluster.6.NK.cells          | 0.254          | 1.000        |
| CD4.T.cells                 | 0.364          | 1.000        |
| CD8.Tscm                    | 0.364          | 1.000        |
| IgD.only.B.cells            | 0.371          | 1.000        |
| Non.classical.monocytes     | 0.371          | 1.000        |
| Switched.memory.B.cells     | 0.440          | 1.000        |
| CD8.CD56..NK.cells          | 0.440          | 1.000        |
| cDCs                        | 0.513          | 1.000        |
| Cluster.3.T.cells           | 0.518          | 1.000        |
| Cluster.25.T.cells          | 0.518          | 1.000        |
| pDCs                        | 0.594          | 1.000        |
| Cluster.23.B.cells          | 0.679          | 1.000        |
| Cluster.25.B.cells          | 0.679          | 1.000        |
| Cluster.25.NK.cells         | 0.679          | 1.000        |
| CD1c.MZ.like                | 0.679          | 1.000        |
| Cluster.16.T.cells          | 0.699          | 1.000        |
| Cluster.23.T.cells          | 0.699          | 1.000        |
| Cluster.17.B.cells          | 0.768          | 1.000        |
| Cluster.15.NK.cells         | 0.768          | 1.000        |
| CXCR5.cDCs                  | 0.768          | 1.000        |
| Treg                        | 0.797          | 1.000        |
| Cluster.7.M.cells           | 0.859          | 1.000        |
| Cluster.11.M.cells          | 0.859          | 1.000        |
| Cluster.26.NK.cells         | 0.859          | 1.000        |
| CD1c.IgM.only               | 0.859          | 1.000        |
| CXCR5.Tem.CD4               | 0.898          | 1.000        |
| Monocytes                   | 0.953          | 1.000        |
| DCs                         | 0.953          | 1.000        |
| CCR6.Intermediate.monocytes | 0.953          | 1.000        |
| CCR6.Classical.monocytes    | 1.000          | 1.000        |
| CCR6.Total.monocytes        | 1.000          | 1.000        |

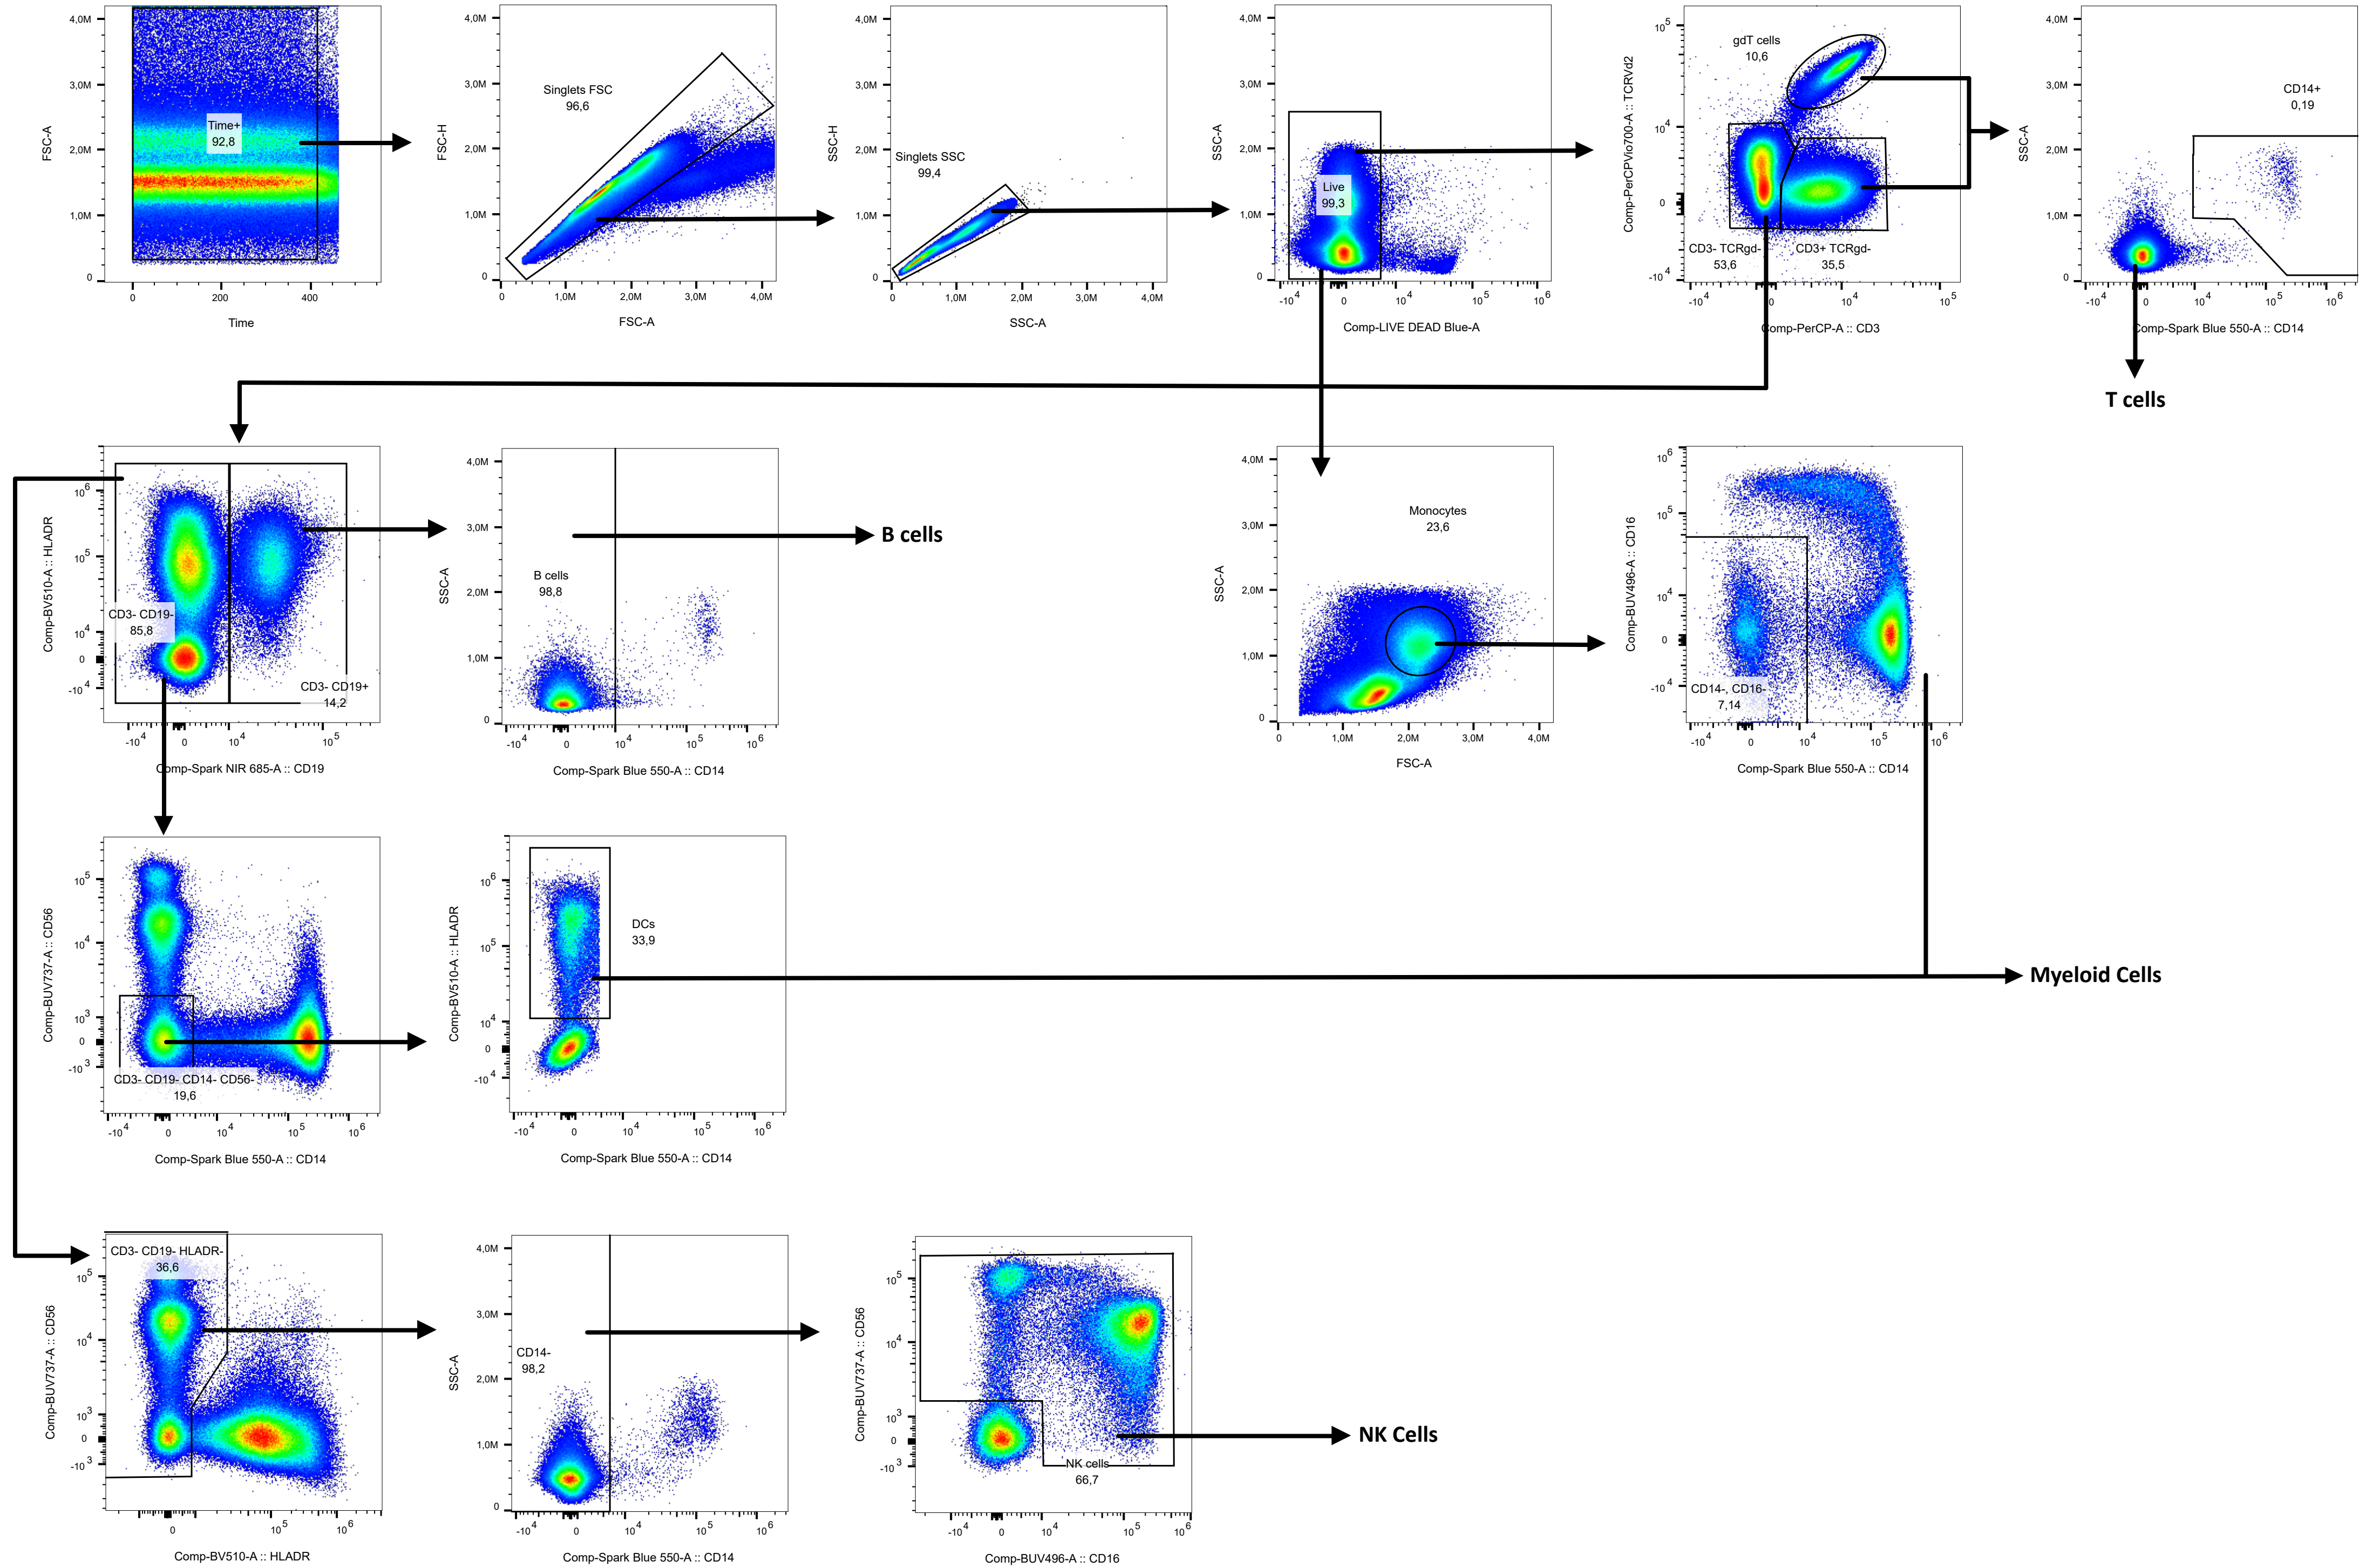

Supplemental Figure 1: Manual gating strategy

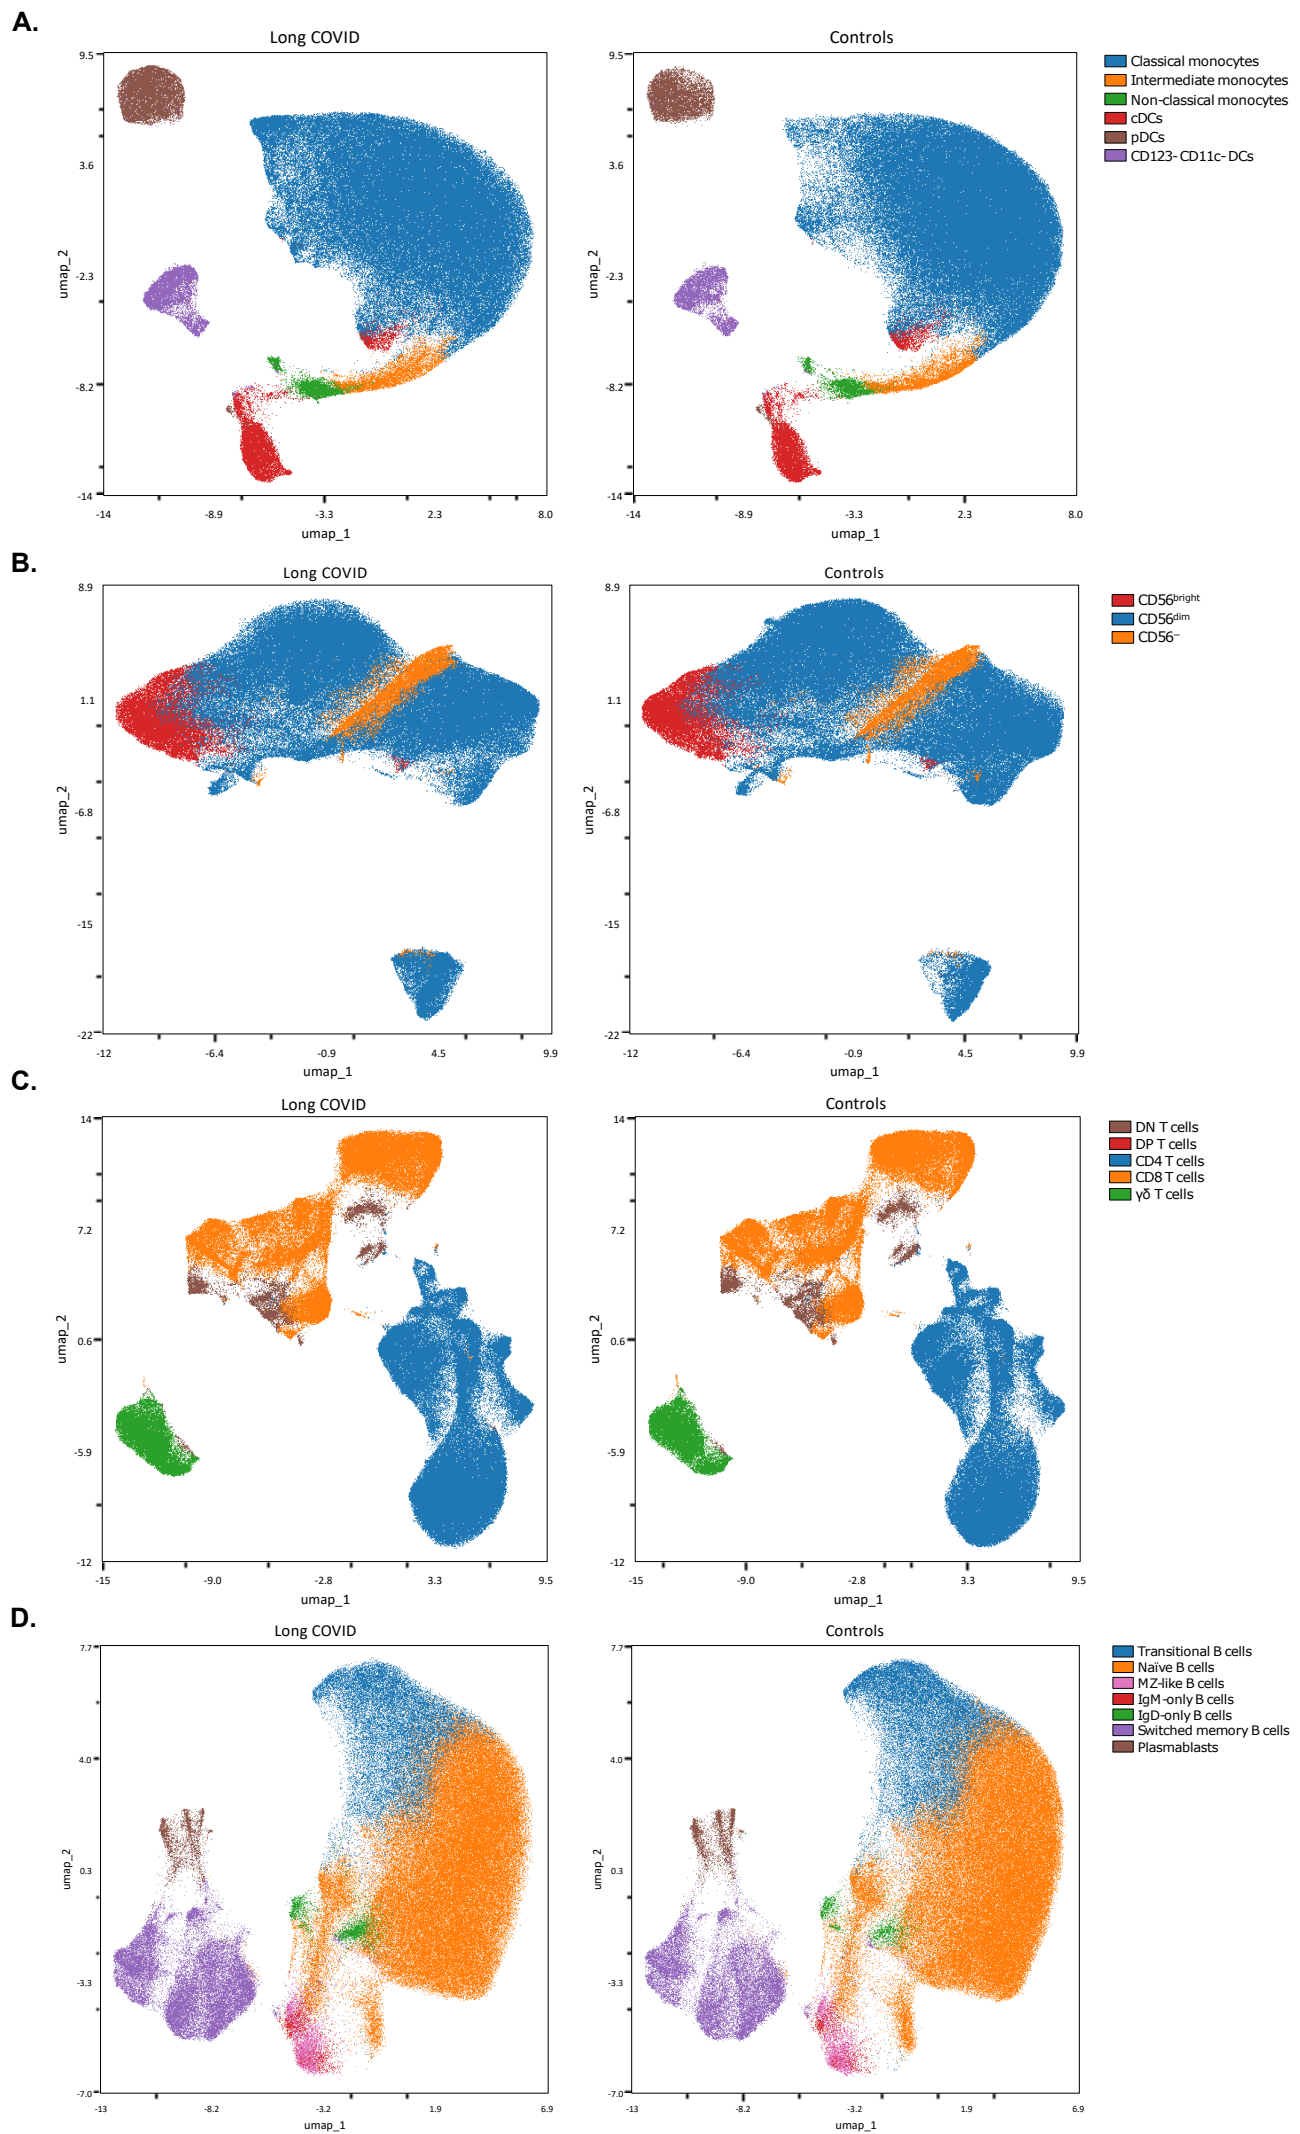

**Supplemental Figure 2: UMAP representing all cell populations analyzed across the different major immune cell types. (A)** Uniform manifold approximation and projection for dimension reduction (UMAP) representing the 6 major myeloid cell populations in which the 17 clusters analyzed using Flow-SOM were grouped depending on specific marker expression. **(B)** UMAP representing the 4 major NK-cell populations into which the 33 clusters analyzed using Flow-SOM were grouped depending on specific marker expression. **(C)** UMAP representing the 5 major T-cell populations into which the 37 clusters analyzed using Flow-SOM were grouped depending on specific marker expression. **(D)** UMAP representing the 6 major B-cell populations in which the 31 clusters analyzed using Flow-SOM were grouped depending on specific marker expression.

## A. Myeloid cells

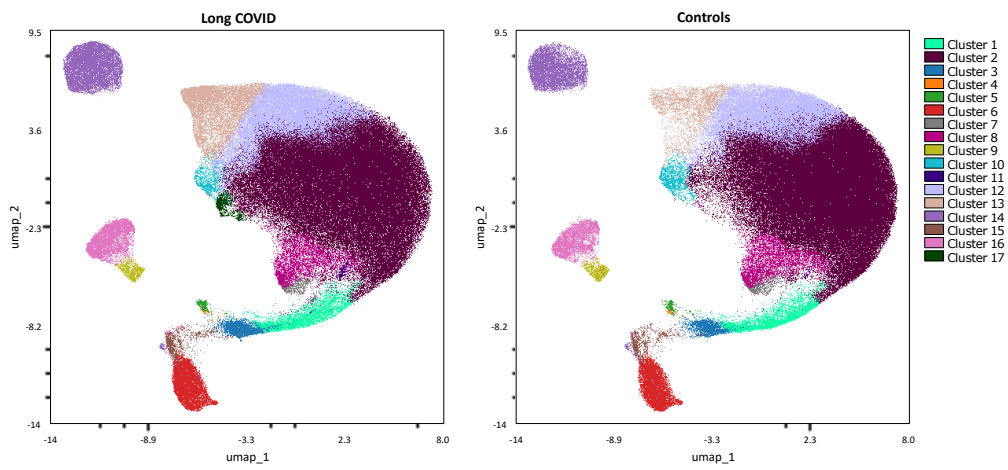

## B. NK cells

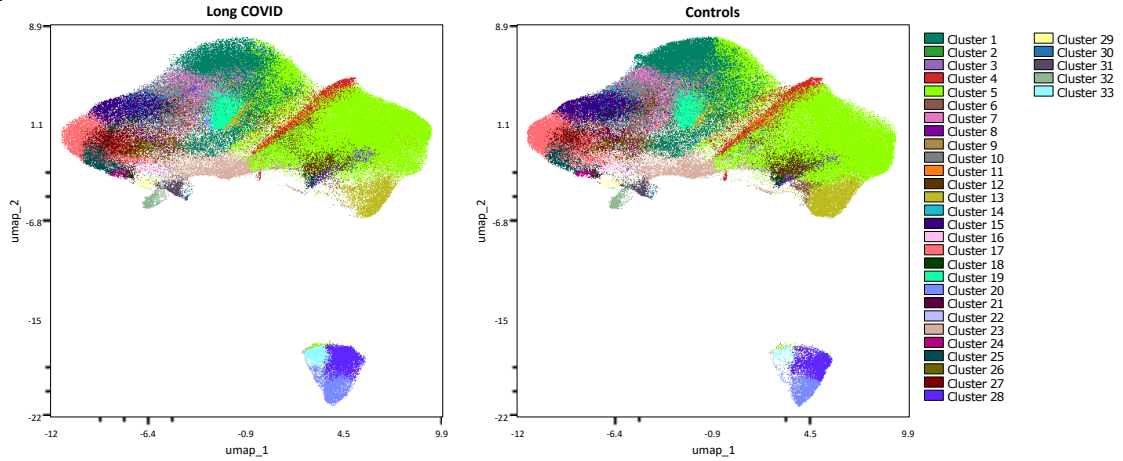

## C. T cells

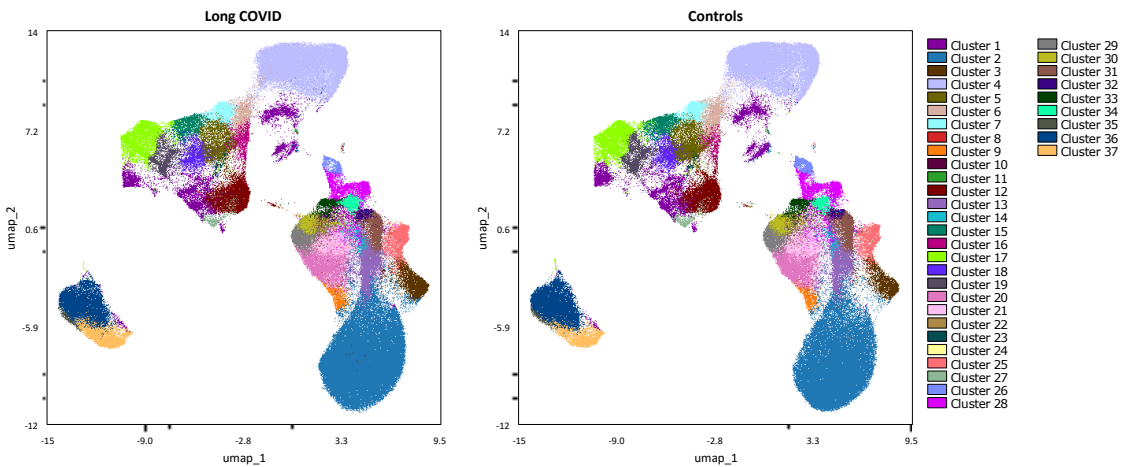

## D. B cells

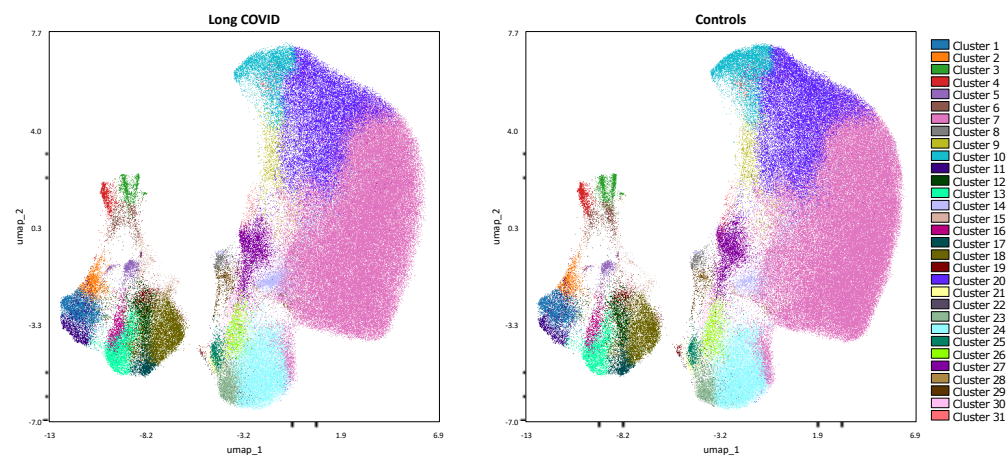

**Supplemental Figure 3: UMAP representing all clusters analyzed across the different cell populations. (A)** Uniform manifold approximation and projection for dimension reduction (UMAP) representing the 17 clusters analyzed in the myeloid cell population using Flow-SOM and grouped depending on specific marker expression. **(B)** UMAP representing the 33 clusters analyzed in the NK-cell population using Flow-SOM and grouped depending on specific marker expression. **(C)** UMAP representing the 37 clusters analyzed in the T-cell population using Flow-SOM and grouped depending on specific marker expression. **(D)** UMAP representing the 31 clusters analyzed in the B-cell population using Flow-SOM and grouped depending on specific marker expression.

**A.**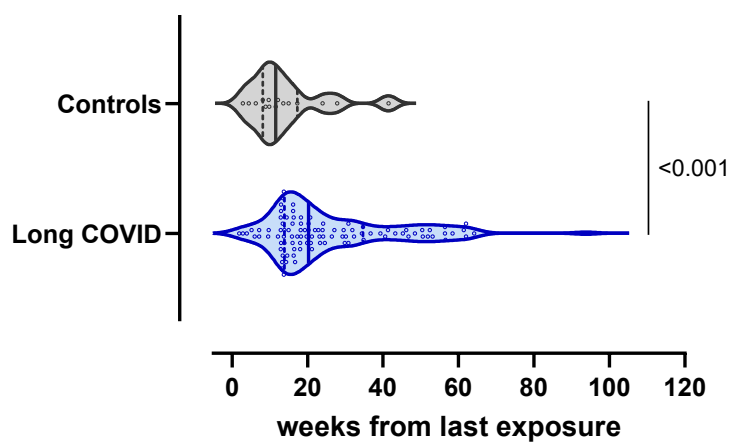**B.**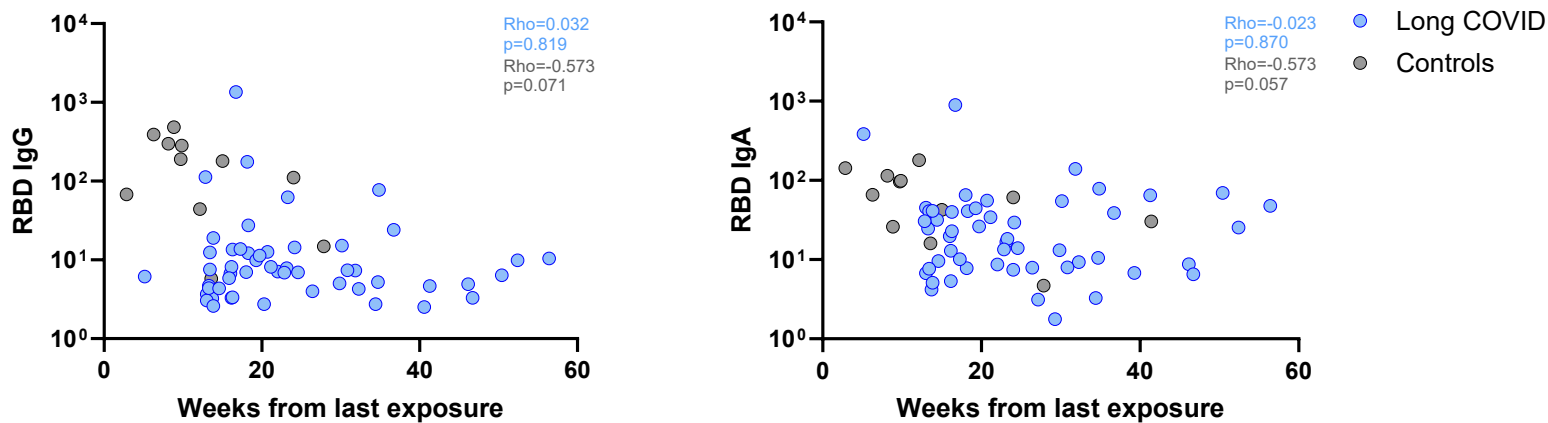**C.**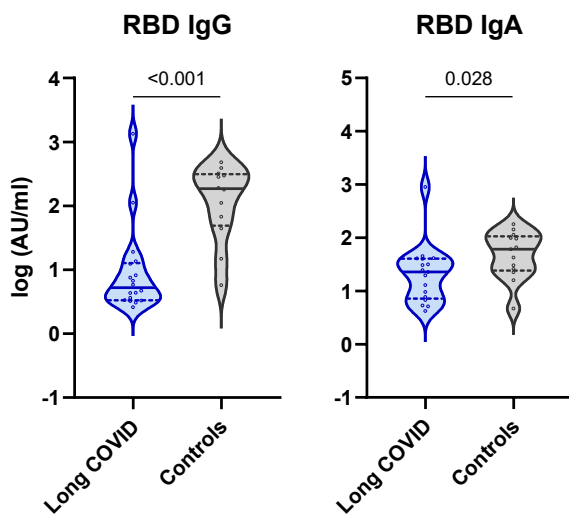**D.**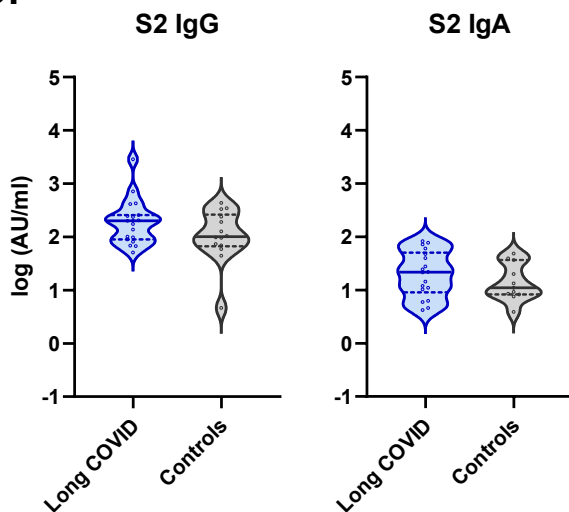**E.**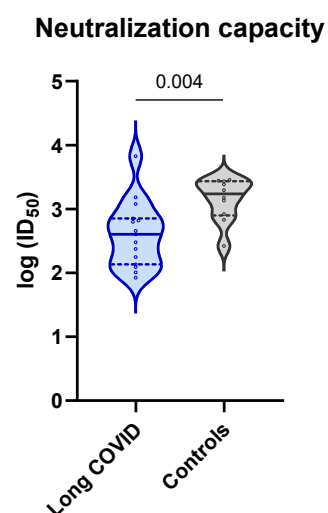

**Supplemental Figure 4: Effect of time on antibody levels among CYP with and without LC.** (A) Time to sample collection from the last exposure (weeks) in the LC and control cohort (median weeks [IQR]; LC: 20.3 [13.9-34.7]; controls: 11.6 [8.1-17.3]) ( $p < 0.001$ ). (B) Correlations of anti-RBD IgG (left) and anti-RBD IgA (right) in the LC and control cohorts (all  $p = n.s.$ ) restricted to one-exposure samples. (C) Specific anti-RBD IgG (left) ( $p < 0.001$ ) and IgA (right) ( $p = 0.028$ ) antibody levels of responders. (D) Specific anti-S2 IgG (left) ( $p = n.s.$ ) and IgA (right) ( $p = n.s.$ ) antibody levels of responders. (E) Specific SARS-CoV-2 neutralizing capacity of responders in half-maximal inhibitory dilution (ID<sub>50</sub>) among the LC and control cohort ( $p = 0.004$ ). Analyses of antibody and neutralization levels were restricted to one-exposure samples with no differences in time from the last exposure (median weeks [IQR]; LC: 13.9 [13.4-16.1]; controls: 11.0 [8.3-21.8]). Each dot represents an individual, and median and IQR values are indicated. p-values according to the Mann-Whitney test. Significant p-values  $< 0.05$ .

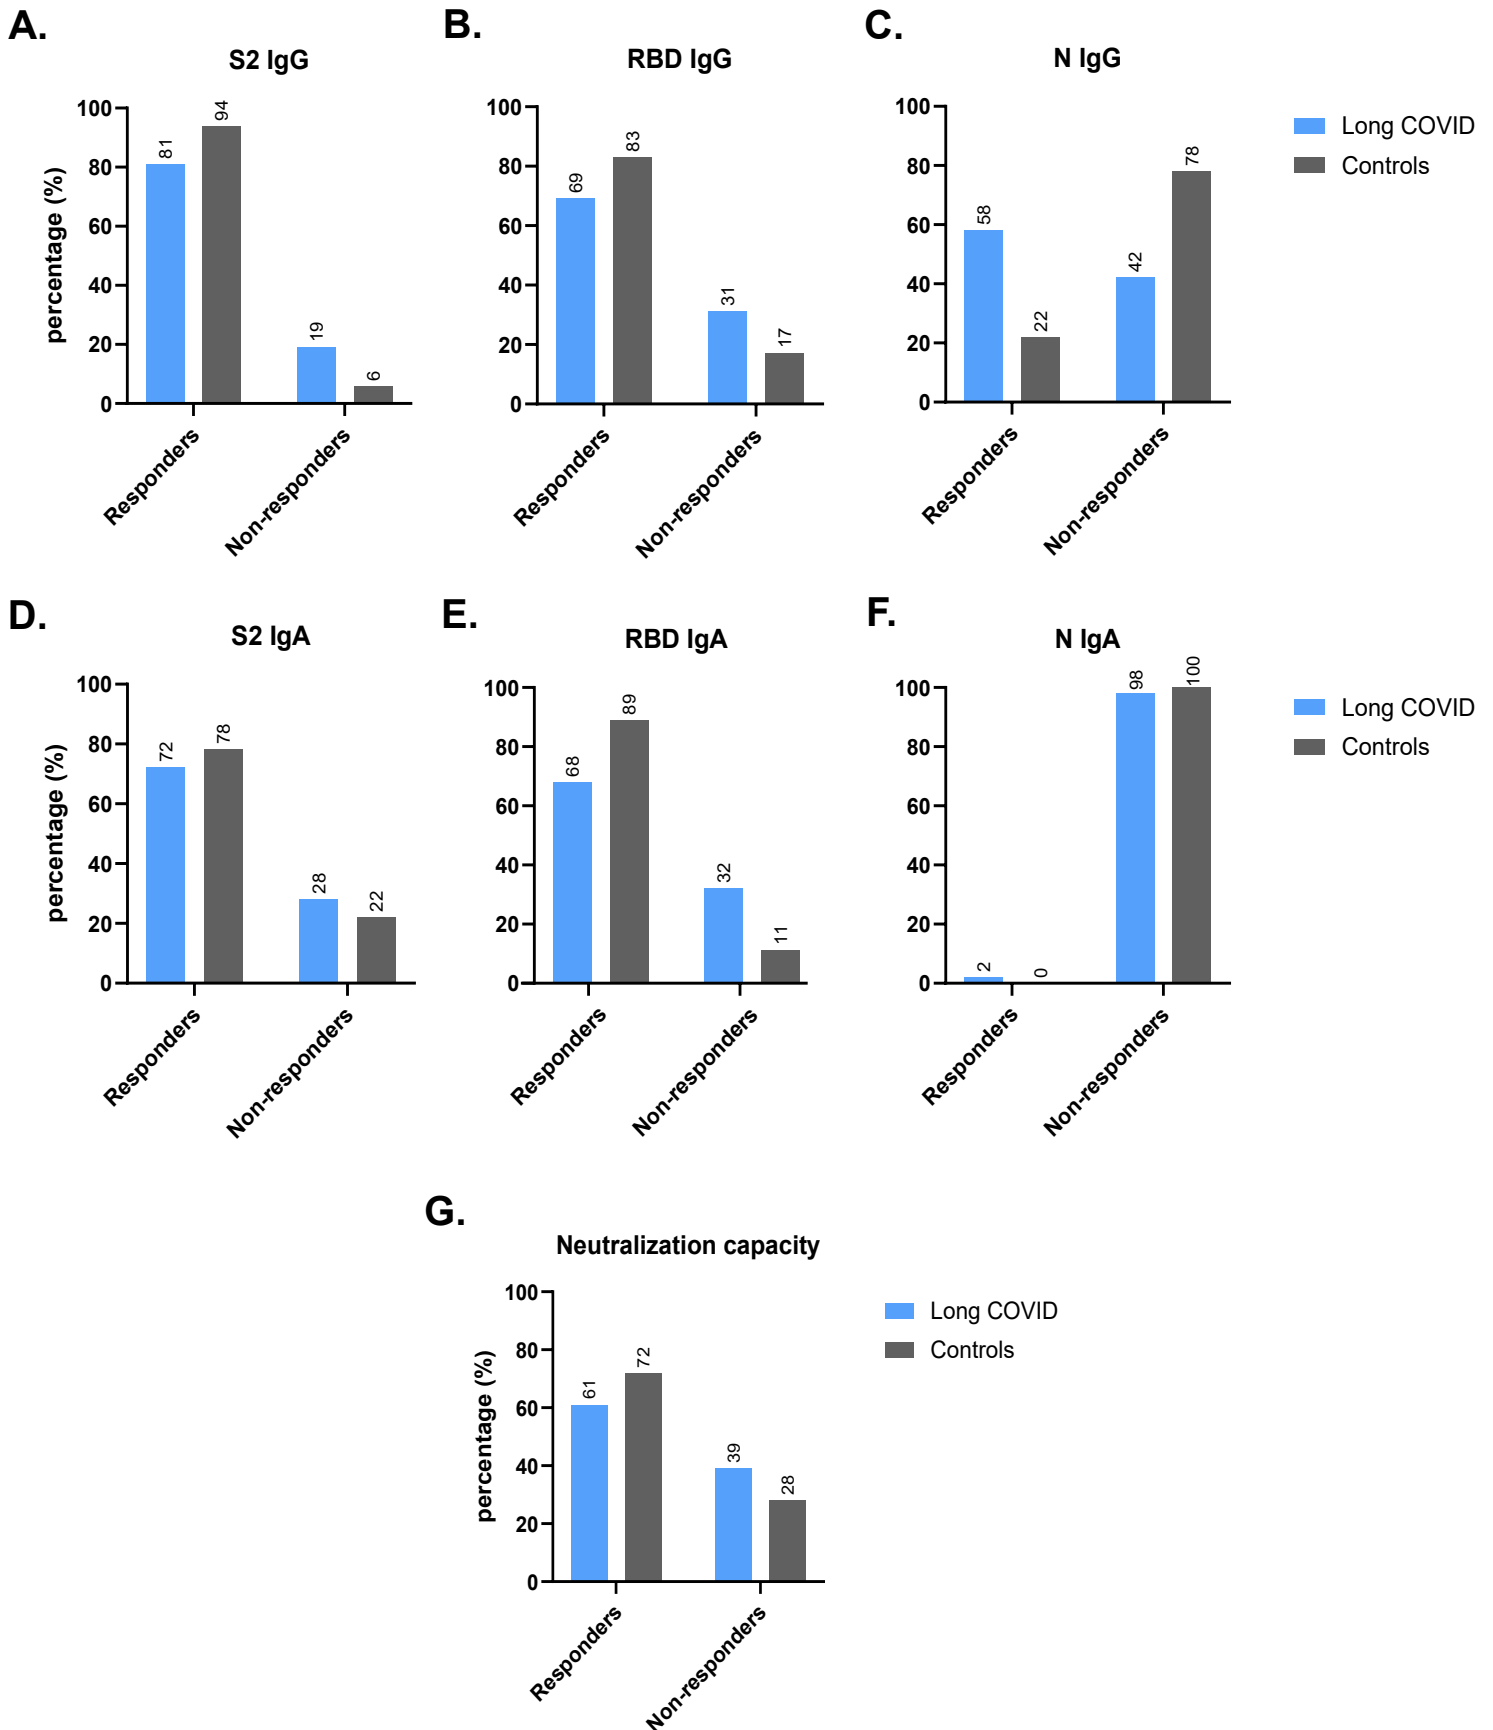

**Supplemental Figure 5: Prevalence of responders and non-responders among CYP with and without LC. (A)** Prevalence of anti-S2 IgG–specific responders and non-responders (%) among the LC and control cohorts. **(B)** Prevalence of anti-RBD IgG–specific responders and non-responders (%) among the LC and control cohorts. **(C)** Prevalence of Specific anti-N IgG responders and non-responders (%) among the LC and control cohorts. **(D)** Prevalence of Specific anti-S2 IgA responders and non-responders (%) among the LC and control cohorts. **(E)** Prevalence of specific anti-RBD IgA responders and non-responders (%) among the LC and control cohorts. **(F)** Prevalence of Specific anti-N IgA responders and non-responders (%) among the LC and control cohorts. **(G)** Prevalence of SARS-CoV-2–specific neutralizing capacity responders and non-responders (%) among the LC and control cohorts. LC n=99; controls n=18 in all analyses.

**A.**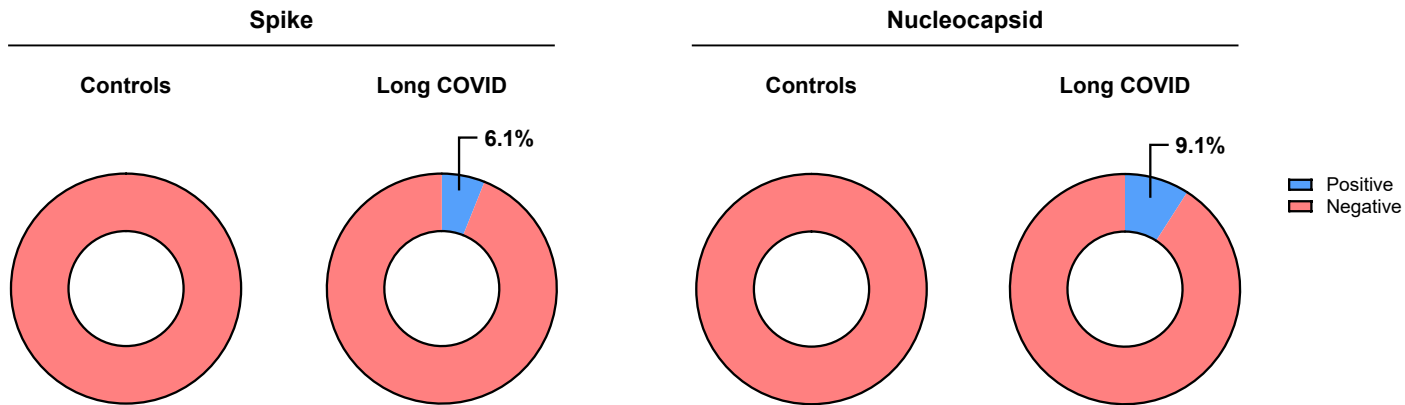**B.**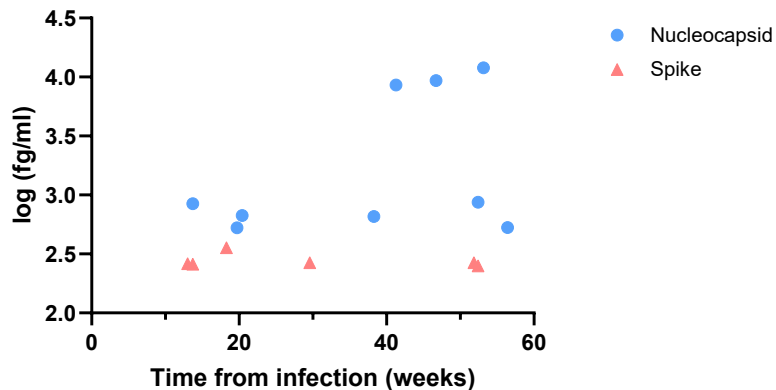

**Supplemental Figure 6: SARS-CoV-2 antigen persistence in CYP with and without long COVID. (A)** Percentage of antigen positivity of individuals with and without long COVID (right Spike, left Nucleocapsid). **(B)** Concentration of Spike (triangle, red) and Nucleocapsid (circle, blue) of positive samples in log(fg/ml) versus time from infection in weeks.

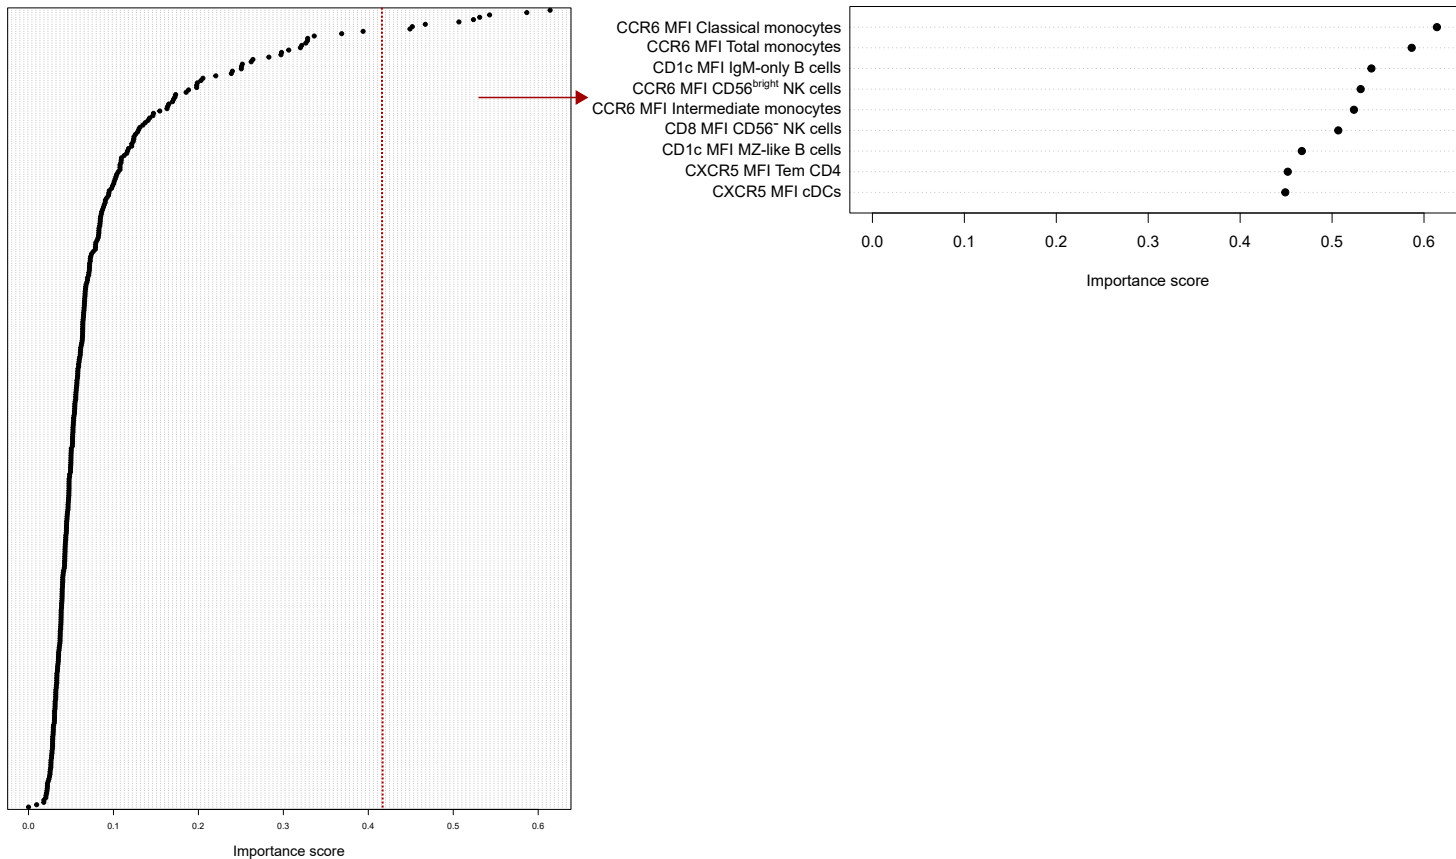

**Supplemental Figure 7: Factor importance in random forest analysis.** Relative variable importance of the factors included in the random forest analysis.

**A.****CCR6 MFI CD56<sup>bright</sup> NK cells**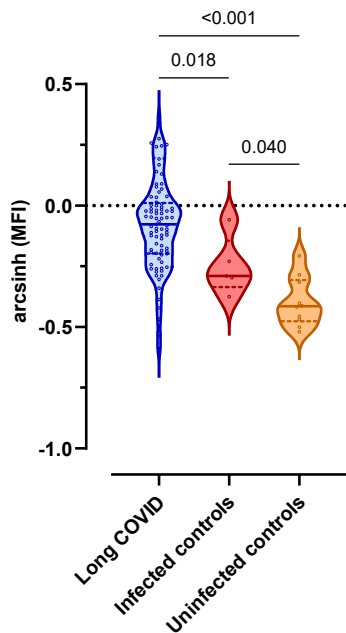**B.****Cluster 15**(switched memory B cells IgA<sup>+</sup>, CD21<sup>-</sup>, CD27<sup>-</sup>)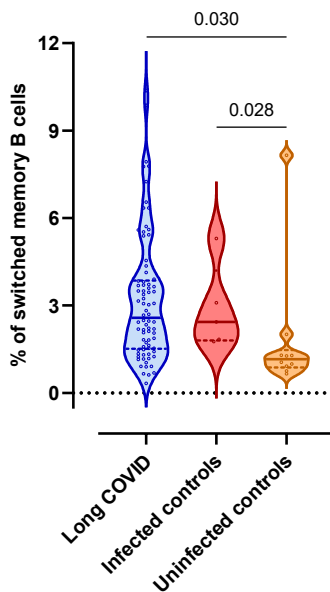**C.****Cluster 19**(switched memory B cells CD27<sup>+</sup>, CD21<sup>+</sup>, CD24<sup>-</sup>)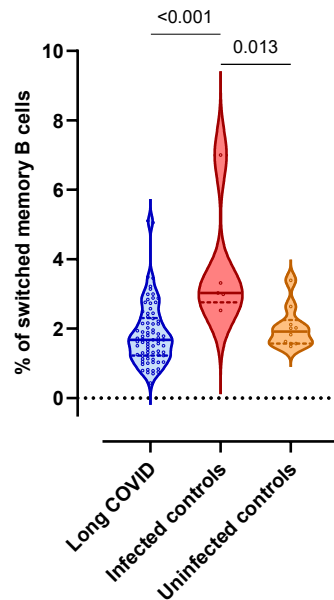

**Supplemental Figure 8: Significant differences between infected and uninfected (vaccinated) controls. (A)** Mean fluorescence intensity (MFI) of CCR6 in CD56<sup>bright</sup> NK cells. **(B)** Frequency of Cluster 15 with respect to total switched memory B cells. **(C)** Frequency of Cluster 19 with respect to total switched memory B cells. Mann-Whitney test, p-values < 0.05 were considered statistically significant.
